# Supplementary material
Source: publisher site journal article supplement (https://www.dovepress.com/article/472004)
Supplement: Supplementary file 1 [file get_supplementary_file.php]

**Electroacupuncture modulates microbial phenylalanine metabolism and enhances the intestinal barrier function to alleviate colitis in mice**

Lei Zhu1#, Ryan Au2#, Luming Dai3#, Yanan Li2, Feng Xu2, Yuan Cui2, Jingyi Hu1*, Hong Shen1*

1Digestive Disease Research Institute, Affiliated Hospital of Nanjing University of Chinese Medicine, City Nanjing, China

2 First Clinical Medical College, Nanjing University of Chinese Medicine, City Nanjing, China

3 Digestive Department, Affiliated Hospital of Nanjing University of Chinese Medicine, City Nanjing, China

**#** These authors contributed equally to this work and share the first authorship.

*** Correspondence:**Hong Shen, Digestive Disease Research Institute, Affiliated Hospital of Nanjing University of Chinese Medicine, City Nanjing, China, Shenhong999@njucm.edu.cn

Jingyi Hu, Digestive Disease Research Institute, Affiliated Hospital of Nanjing University of Chinese Medicine, City Nanjing, China, hjytcm@163.com

**Table S1 Primer sequences for qRT-PCR**

| **Gene** | **Sequence** |
| --- | --- |
| ***Mouse-Zo1*** | AGTTCTGCCCTCAGCTACCA  GCTTAAAGCTGGCAGTGTC |
| ***Mouse-Occludin*** | ACAAAGAGCTCTCTCGTCTCG  CATAGTCTCCCACCATCCTC |
| ***Mouse-Claduin2*** | GTCAGCTTGCCAGAGACACT  TTCGCTTGTCTTTTGGCTGC |
| ***Mouse-Il1β*** | GAAATGCCACCTTTTGACAGTG  TGGATGCTCTCATCAGGACAG |
| ***Mouse-Il6*** | CCACTTCACAAGTCGGAGGCTTA  AGTGCATCATCGTTGTTCATAC |
| ***Mouse-Tnfα*** | AAGGCCGGGGTGTCCTGGAG  AGGCC AGGTGGGGACAGCTC |
| ***Mous-Ifng*** | CGGCACAGTCATTGAAAGCC  TGCATCCTTTTTCGCCTTGC |
| ***Mouse-Muc2*** | TGTGTTTCAGGCTCCATCAC  TGCAGCCATTGTAGGAAATC |
| ***Mouse-Nos2*** | TTGGGTCTTGTTCACCACGG  CCTCTTTCAGGTCACTTTGGTAGG |
| ***Mouse-Cxcl9*** | AAACAGTTTGCCCCAAGCCC  CCGAGTCCGGATCTAGGCAG |
| ***Mouse-Cxcl2*** | CTGTTCACAGTTGCCGGCTG  AGCTTCTTTGGGACACCTGCT |
| ***Mouse-Ccl2*** | CCTGCTGCTACTCATTCACCA  ATTCCTTCTTGGGGTCAGCA |
| ***Mouse-Mpo*** | GAGTCCCACTCAGCAAGGTC  TCTGGCGATTCAGTTTGGCTr4trt |
| ***Mouse-β-actin*** | CCACTGTCGAGTCGCGTCC  GCCCACGATGGAGGGGAATA |


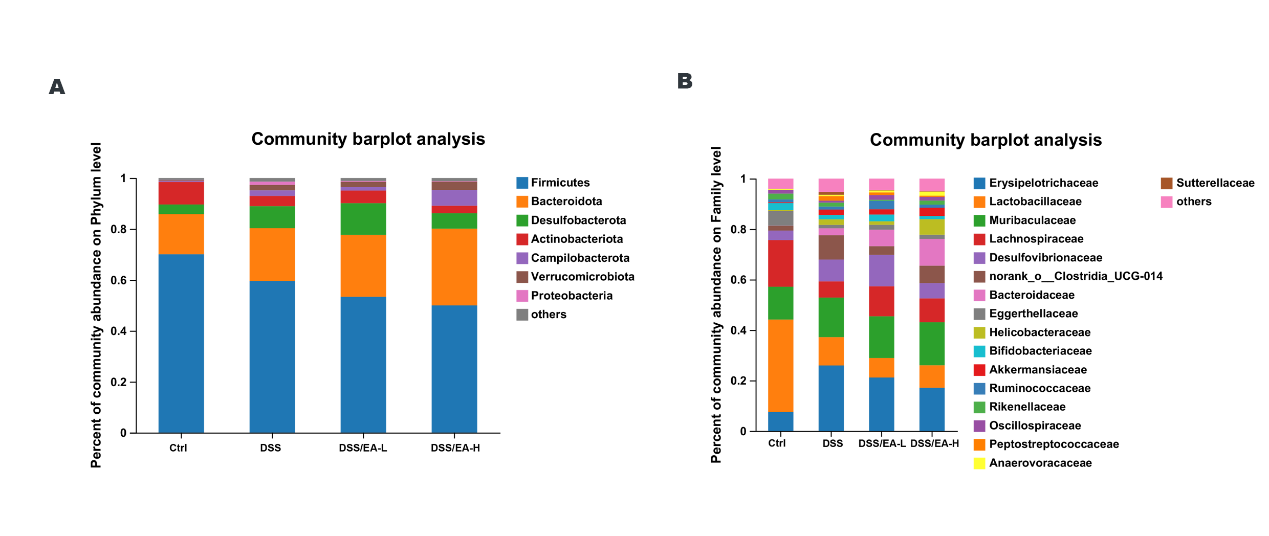
**Figure S1**

Supplemental Figure legends

Figure. S1

A. Analysis of differences in microbial taxa at the phylum level. B. Analysis of differences in microbial taxa at the family level.
